# Supplementary material for: The Influence of Airborne Particulate Matter on the Risk of Gestational Diabetes Mellitus: A Large Retrospective Study in Chongqing, China
Source: MDPI journal article supplement (doi:10.3390/toxics12010019), 2023-12-24
Supplement: s1 [file s1]

**Table S1.** Adjusted odds ratios (ORs) and 95% confidence intervals (CIs) for air pollution exposure and the risk of GDM in co-pollutant models, 2018-2021.

|                         | Adjusting for      | Pre-pregnancy |             | First trimester |                 | Second trimester |                |
|-------------------------|--------------------|---------------|-------------|-----------------|-----------------|------------------|----------------|
|                         |                    | OR            | 95% (CI)    | OR              | 95% (CI)        | OR               | 95% (CI)       |
| <b>NO<sub>2</sub></b>   | +O <sub>3</sub>    | 0.92          | (0.86~0.99) | 0.97            | (0.89~1.04)     | 1.04             | (0.96~1.13)    |
|                         | +PM <sub>10</sub>  | 0.95          | (0.89~1.02) | 0.96            | (0.89~1.02)     | 0.98             | (0.91~1.05)    |
|                         | +PM <sub>2.5</sub> | 0.95          | (0.89~1.01) | 0.97            | (0.91~1.03)     | 0.97             | (0.91~1.03)    |
|                         | +CO                | 0.94          | (0.88~1.01) | 0.99            | (0.92~1.05)     | 0.97             | (0.91~1.03)    |
|                         | +SO <sub>2</sub>   | 0.96          | (0.90~1.02) | 1.01            | (0.94~1.07)     | 0.97             | (0.91~1.03)    |
| <b>O<sub>3</sub></b>    | +NO <sub>2</sub>   | 0.82          | (0.70~0.96) | 0.80            | (0.65~0.98)     | 1.58             | (1.16~2.14) ** |
|                         | +PM <sub>10</sub>  | 0.85          | (0.72~1.00) | 0.99            | (0.81~1.20)     | 1.41             | (1.11~1.78) ** |
|                         | +PM <sub>2.5</sub> | 0.88          | (0.74~1.05) | 1.04            | (0.85~1.26)     | 1.43             | (1.14~1.78) ** |
|                         | +CO                | 0.92          | (0.78~1.09) | 0.90            | (0.75~1.06)     | 1.44             | (1.15~1.80) ** |
|                         | +SO <sub>2</sub>   | 0.87          | (0.76~1.01) | 0.86            | (0.73~1.01)     | 1.39             | (1.11~1.74) ** |
| <b>PM<sub>10</sub></b>  | +NO <sub>2</sub>   | 1.05          | (0.91~1.20) | 1.24            | (1.10~1.39) **  | 0.94             | (0.79~1.11)    |
|                         | +O <sub>3</sub>    | 0.95          | (0.81~1.10) | 1.20            | (1.05~1.36) **  | 0.97             | (0.83~1.13)    |
|                         | +CO                | 0.95          | (0.82~1.09) | 1.17            | (1.04~1.31)     | 0.90             | (0.78~1.05)    |
|                         | +SO <sub>2</sub>   | 1.04          | (0.90~1.19) | 1.24            | (1.10~1.40) **  | 0.93             | (0.80~1.08)    |
| <b>PM<sub>2.5</sub></b> | +NO <sub>2</sub>   | 1.10          | (0.96~1.27) | 1.34            | (1.17~1.55) *** | 1.00             | (0.78~1.26)    |

|                       |                    |      |             |      |                 |      |             |
|-----------------------|--------------------|------|-------------|------|-----------------|------|-------------|
| <b>CO</b>             | +O <sub>3</sub>    | 1.02 | (0.86~1.20) | 1.34 | (1.14~1.57) *** | 0.99 | (0.79~1.25) |
|                       | +SO <sub>2</sub>   | 1.11 | (0.96~1.29) | 1.38 | (1.19~1.61) *** | 0.98 | (0.78~1.24) |
| <b>SO<sub>2</sub></b> | +NO <sub>2</sub>   | 1.10 | (1.01~1.20) | 1.11 | (1.01~1.21)     | 1.00 | (0.92~1.09) |
|                       | +O <sub>3</sub>    | 1.06 | (0.97~1.17) | 1.09 | (0.99~1.20)     | 1.01 | (0.93~1.10) |
|                       | +PM <sub>10</sub>  | 1.11 | (1.01~1.22) | 1.05 | (0.95~1.16)     | 1.00 | (0.92~1.08) |
|                       | +SO <sub>2</sub>   | 1.09 | (1.01~1.19) | 1.10 | (1.01~1.20)     | 0.99 | (0.91~1.07) |
|                       | +NO <sub>2</sub>   | 0.99 | (0.93~1.05) | 1.01 | (0.95~1.07)     | 0.93 | (0.87~0.99) |
|                       | +O <sub>3</sub>    | 0.99 | (0.93~1.05) | 1.00 | (0.94~1.06)     | 0.94 | (0.88~1.00) |
|                       | +PM <sub>10</sub>  | 0.98 | (0.92~1.05) | 0.95 | (0.89~1.02)     | 0.93 | (0.87~1.00) |
|                       | +PM <sub>2.5</sub> | 0.97 | (0.91~1.04) | 0.95 | (0.89~1.01)     | 0.93 | (0.87~0.99) |
|                       | +CO                | 0.98 | (0.92~1.04) | 1.00 | (0.94~1.06)     | 0.92 | (0.87~0.99) |

Bonferroni corrections with significance ( $p < 0.006$ ), \*\*  $p < 0.006$ , and \*\*\*  $p < 0.001$ .

Abbreviations: GDM, gestational diabetes mellitus; NO<sub>2</sub>, nitrogen dioxide; O<sub>3</sub>, ozone; PM<sub>10</sub>, inhalable particulate matter; PM<sub>2.5</sub>, fine particulate matter; CO, carbon monoxide; SO<sub>2</sub>, sulfur dioxide.

Model adjusted for maternal age, first-trimester BMI, gravidity, parity, tobacco, alcohol, folic acid, assisted reproduction, macrosomia, multiple pregnancies, the season of OGTT, temperature, and relative humidity.

**Table S2.** Adjusted odds ratios (ORs) and 95% confidence intervals (CIs) for air pollution exposure and the risk of GDM-IFH in co-pollutant models, 2018-

2021.

|                   | Adjusting for      | Pre-pregnancy |             | First trimester |             | Second trimester |             |
|-------------------|--------------------|---------------|-------------|-----------------|-------------|------------------|-------------|
|                   |                    | OR            | 95% (CI)    | OR              | 95% (CI)    | OR               | 95% (CI)    |
| NO <sub>2</sub>   |                    |               |             |                 |             |                  |             |
|                   | +O <sub>3</sub>    | 0.87          | (0.70~1.07) | 0.86            | (0.70~1.07) | 0.89             | (0.71~1.12) |
|                   | +PM <sub>10</sub>  | 0.85          | (0.70~1.04) | 0.84            | (0.70~1.02) | 0.85             | (0.70~1.03) |
|                   | +PM <sub>2.5</sub> | 0.87          | (0.72~1.06) | 0.86            | (0.72~1.03) | 0.88             | (0.74~1.05) |
|                   | +CO                | 0.86          | (0.71~1.05) | 0.86            | (0.71~1.04) | 0.89             | (0.74~1.06) |
|                   | +SO <sub>2</sub>   | 0.88          | (0.73~1.07) | 0.87            | (0.73~1.04) | 0.89             | (0.75~1.06) |
| O <sub>3</sub>    |                    |               |             |                 |             |                  |             |
|                   | +NO <sub>2</sub>   | 0.90          | (0.56~1.44) | 0.98            | (0.55~1.74) | 0.98             | (0.41~2.35) |
|                   | +PM <sub>10</sub>  | 1.09          | (0.69~1.71) | 1.39            | (0.76~2.55) | 1.42             | (0.71~2.84) |
|                   | +PM <sub>2.5</sub> | 1.11          | (0.70~1.75) | 1.38            | (0.75~2.54) | 1.35             | (0.69~2.65) |
|                   | +CO                | 1.22          | (0.76~1.93) | 1.24            | (0.72~2.15) | 1.34             | (0.68~2.66) |
|                   | +SO <sub>2</sub>   | 1.08          | (0.71~1.65) | 1.17            | (0.71~1.93) | 1.31             | (0.67~2.55) |
| PM <sub>10</sub>  |                    |               |             |                 |             |                  |             |
|                   | +NO <sub>2</sub>   | 1.09          | (0.71~1.66) | 1.14            | (0.82~1.57) | 1.38             | (0.88~2.15) |
|                   | +O <sub>3</sub>    | 0.98          | (0.63~1.51) | 1.15            | (0.79~1.66) | 1.26             | (0.82~1.93) |
|                   | +CO                | 0.87          | (0.56~1.35) | 1.04            | (0.73~1.48) | 1.19             | (0.78~1.82) |
|                   | +SO <sub>2</sub>   | 1.07          | (0.69~1.67) | 1.13            | (0.79~1.61) | 1.20             | (0.79~1.84) |
| PM <sub>2.5</sub> |                    |               |             |                 |             |                  |             |
|                   | +NO <sub>2</sub>   | 1.05          | (0.67~1.64) | 1.08            | (0.76~1.53) | 1.26             | (0.72~2.21) |
|                   | +O <sub>3</sub>    | 1.03          | (0.64~1.67) | 1.16            | (0.75~1.78) | 1.23             | (0.70~2.16) |

|                       |                    |      |             |      |             |      |             |
|-----------------------|--------------------|------|-------------|------|-------------|------|-------------|
| <b>CO</b>             | +SO <sub>2</sub>   | 1.10 | (0.68~1.77) | 1.11 | (0.75~1.64) | 1.20 | (0.67~2.12) |
|                       | +NO <sub>2</sub>   | 1.16 | (0.90~1.51) | 1.04 | (0.79~1.36) | 1.05 | (0.82~1.33) |
|                       | +O <sub>3</sub>    | 1.16 | (0.88~1.54) | 1.03 | (0.77~1.37) | 1.04 | (0.81~1.33) |
|                       | +PM <sub>10</sub>  | 1.15 | (0.87~1.52) | 0.96 | (0.71~1.30) | 1.00 | (0.78~1.28) |
|                       | +SO <sub>2</sub>   | 1.15 | (0.88~1.48) | 1.00 | (0.77~1.30) | 1.01 | (0.80~1.29) |
| <b>SO<sub>2</sub></b> | +NO <sub>2</sub>   | 0.89 | (0.73~1.07) | 0.94 | (0.78~1.12) | 0.99 | (0.79~1.22) |
|                       | +O <sub>3</sub>    | 0.89 | (0.73~1.07) | 0.93 | (0.78~1.12) | 1.00 | (0.80~1.23) |
|                       | +PM <sub>10</sub>  | 0.88 | (0.71~1.08) | 0.89 | (0.72~1.09) | 0.98 | (0.77~1.21) |
|                       | +PM <sub>2.5</sub> | 0.88 | (0.72~1.07) | 0.90 | (0.74~1.10) | 0.98 | (0.78~1.21) |
|                       | +CO                | 0.88 | (0.72~1.06) | 0.92 | (0.77~1.11) | 0.99 | (0.79~1.22) |

Bonferroni corrections with significance ( $p < 0.006$ ), \*\*  $p < 0.006$ , and \*\*\*  $p < 0.001$ .

Abbreviations: GDM-IFH, GDM with isolated fasting hyperglycaemia; NO<sub>2</sub>, nitrogen dioxide; O<sub>3</sub>, ozone; PM<sub>10</sub>, inhalable particulate matter; PM<sub>2.5</sub>, fine particulate matter; CO, carbon monoxide; SO<sub>2</sub>, sulfur dioxide.

Model adjusted for maternal age, first-trimester BMI, gravidity, parity, tobacco, alcohol, folic acid, assisted reproduction, macrosomia, multiple pregnancies, the season of OGTT, temperature, and relative humidity.

**Table S3.** Adjusted odds ratios (ORs) and 95% confidence intervals (CIs) for air pollution exposure and the risk of GDM-IPH in co-pollutant models, 2018-2021.

|  | Pre-pregnancy | First trimester | Second trimester |
|--|---------------|-----------------|------------------|
|--|---------------|-----------------|------------------|

|                         | Adjusting for      | OR   | 95% (CI)       | OR   | 95% (CI)        | OR   | 95% (CI)           |
|-------------------------|--------------------|------|----------------|------|-----------------|------|--------------------|
| <b>NO<sub>2</sub></b>   | +O <sub>3</sub>    | 0.98 | (0.90~1.06)    | 1.02 | (0.93~1.11)     | 1.17 | (1.07~1.29)<br>**  |
|                         | +PM <sub>10</sub>  | 1.02 | (0.94~1.11)    | 1.03 | (0.95~1.12)     | 1.08 | (0.99~1.17)        |
|                         | +PM <sub>2.5</sub> | 1.02 | (0.95~1.10)    | 1.04 | (0.96~1.12)     | 1.04 | (0.97~1.12)        |
|                         | +CO                | 1.02 | (0.94~1.10)    | 1.06 | (0.98~1.14)     | 1.03 | (0.96~1.11)        |
|                         | +SO <sub>2</sub>   | 1.04 | (0.96~1.12)    | 1.08 | (1.00~1.16)     | 1.03 | (0.96~1.11)        |
| <b>O<sub>3</sub></b>    | +NO <sub>2</sub>   | 0.75 | (0.62~0.90) ** | 0.76 | (0.61~0.95)     | 2.05 | (1.44~2.91)<br>*** |
|                         | +PM <sub>10</sub>  | 0.74 | (0.61~0.89) ** | 0.85 | (0.67~1.09)     | 1.35 | (1.03~1.77)        |
|                         | +PM <sub>2.5</sub> | 0.76 | (0.62~0.93)    | 0.89 | (0.69~1.13)     | 1.38 | (1.06~1.79)        |
|                         | +CO                | 0.79 | (0.65~0.95)    | 0.77 | (0.63~0.96)     | 1.41 | (1.08~1.83)        |
|                         | +SO <sub>2</sub>   | 0.76 | (0.64~0.90) ** | 0.73 | (0.60~0.89) **  | 1.32 | (1.02~1.72)        |
| <b>PM<sub>10</sub></b>  | +NO <sub>2</sub>   | 1.07 | (0.91~1.24)    | 1.21 | (1.05~1.38)     | 0.82 | (0.67~1.01)        |
|                         | +O <sub>3</sub>    | 0.95 | (0.80~1.12)    | 1.16 | (1.00~1.35)     | 0.96 | (0.80~1.15)        |
|                         | +CO                | 1.00 | (0.85~1.18)    | 1.19 | (1.04~1.37)     | 0.89 | (0.75~1.07)        |
|                         | +SO <sub>2</sub>   | 1.10 | (0.93~1.29)    | 1.29 | (1.12~1.49) **  | 0.95 | (0.80~1.13)        |
| <b>PM<sub>2.5</sub></b> | +NO <sub>2</sub>   | 1.15 | (0.99~1.35)    | 1.35 | (1.15~1.59) *** | 0.84 | (0.67~1.06)        |
|                         | +O <sub>3</sub>    | 1.01 | (0.84~1.22)    | 1.31 | (1.09~1.57) **  | 0.89 | (0.71~1.11)        |
|                         | +SO <sub>2</sub>   | 1.18 | (1.00~1.40)    | 1.46 | (1.22~1.74) *** | 0.90 | (0.72~1.13)        |

|                       |                    |      |             |      |             |      |                   |
|-----------------------|--------------------|------|-------------|------|-------------|------|-------------------|
| <b>CO</b>             |                    |      |             |      |             |      |                   |
|                       | +NO <sub>2</sub>   | 1.11 | (1.00~1.22) | 1.11 | (1.00~1.24) | 1.02 | (0.92~1.12)       |
|                       | +O <sub>3</sub>    | 1.04 | (0.93~1.16) | 1.09 | (0.97~1.21) | 1.04 | (0.95~1.15)       |
|                       | +PM <sub>10</sub>  | 1.11 | (1.00~1.24) | 1.07 | (0.95~1.20) | 1.03 | (0.94~1.14)       |
|                       | +SO <sub>2</sub>   | 1.12 | (1.01~1.23) | 1.13 | (1.02~1.26) | 1.01 | (0.92~1.11)       |
| <b>SO<sub>2</sub></b> |                    |      |             |      |             |      |                   |
|                       | +NO <sub>2</sub>   | 1.01 | (0.94~1.08) | 1.01 | (0.95~1.09) | 0.87 | (0.81~0.94)<br>** |
|                       | +O <sub>3</sub>    | 1.00 | (0.93~1.07) | 1.00 | (0.94~1.08) | 0.88 | (0.81~0.95)<br>** |
|                       | +PM <sub>10</sub>  | 0.99 | (0.91~1.07) | 0.95 | (0.88~1.03) | 0.88 | (0.81~0.95)<br>** |
|                       | +PM <sub>2.5</sub> | 0.98 | (0.91~1.06) | 0.95 | (0.88~1.03) | 0.87 | (0.81~0.94)<br>** |
|                       | +CO                | 0.99 | (0.93~1.07) | 1.01 | (0.94~1.08) | 0.87 | (0.81~0.94)<br>** |

---

Bonferroni corrections with significance ( $p < 0.006$ ), \*\*  $p < 0.006$ , and \*\*\*  $p < 0.001$ .

Abbreviations: GDM-IPH, GDM with isolated post-load hyperglycemia; NO<sub>2</sub>, nitrogen dioxide; O<sub>3</sub>, ozone; PM<sub>10</sub>, inhalable particulate matter; PM<sub>2.5</sub>, fine particulate matter; CO, carbon monoxide; SO<sub>2</sub>, sulfur dioxide.

Model adjusted for maternal age, first-trimester BMI, gravidity, parity, tobacco, alcohol, folic acid, assisted reproduction, macrosomia, multiple pregnancies, the season of OGTT, temperature, and relative humidity.

**Table S4.** Adjusted odds ratios (ORs) and 95% confidence intervals (CIs) for air pollution exposure and the risk of GDM-CH in co-pollutant models, 2018-

2021.

|                   | Adjusting for      | Pre-pregnancy |             | First trimester |             | Second trimester |             |
|-------------------|--------------------|---------------|-------------|-----------------|-------------|------------------|-------------|
|                   |                    | OR            | 95% (CI)    | OR              | 95% (CI)    | OR               | 95% (CI)    |
| NO <sub>2</sub>   |                    |               |             |                 |             |                  |             |
|                   | +O <sub>3</sub>    | 0.97          | (0.80~1.17) | 1.00            | (0.83~1.21) | 0.86             | (0.70~1.05) |
|                   | +PM <sub>10</sub>  | 1.00          | (0.83~1.20) | 1.00            | (0.84~1.20) | 0.93             | (0.78~1.10) |
|                   | +PM <sub>2.5</sub> | 0.97          | (0.82~1.15) | 0.98            | (0.83~1.16) | 0.91             | (0.78~1.07) |
|                   | +CO                | 0.97          | (0.82~1.14) | 0.97            | (0.82~1.15) | 0.94             | (0.80~1.09) |
|                   | +SO <sub>2</sub>   | 0.96          | (0.81~1.13) | 0.97            | (0.82~1.14) | 0.92             | (0.79~1.07) |
| O <sub>3</sub>    |                    |               |             |                 |             |                  |             |
|                   | +NO <sub>2</sub>   | 1.06          | (0.71~1.60) | 1.22            | (0.76~1.94) | 0.67             | (0.31~1.45) |
|                   | +PM <sub>10</sub>  | 0.98          | (0.66~1.47) | 1.06            | (0.64~1.76) | 0.90             | (0.48~1.69) |
|                   | +PM <sub>2.5</sub> | 1.02          | (0.68~1.52) | 1.11            | (0.67~1.83) | 0.98             | (0.54~1.80) |
|                   | +CO                | 1.05          | (0.70~1.58) | 1.19            | (0.77~1.85) | 0.90             | (0.49~1.63) |
|                   | +SO <sub>2</sub>   | 1.09          | (0.76~1.56) | 1.18            | (0.79~1.77) | 1.04             | (0.57~1.89) |
| PM <sub>10</sub>  |                    |               |             |                 |             |                  |             |
|                   | +NO <sub>2</sub>   | 0.79          | (0.55~1.15) | 0.85            | (0.64~1.13) | 0.95             | (0.63~1.42) |
|                   | +O <sub>3</sub>    | 0.78          | (0.53~1.15) | 0.87            | (0.63~1.21) | 0.86             | (0.59~1.25) |
|                   | +CO                | 0.79          | (0.53~1.17) | 0.84            | (0.62~1.14) | 0.93             | (0.65~1.35) |
|                   | +SO <sub>2</sub>   | 0.80          | (0.55~1.17) | 0.86            | (0.64~1.16) | 0.82             | (0.57~1.19) |
| PM <sub>2.5</sub> |                    |               |             |                 |             |                  |             |
|                   | +NO <sub>2</sub>   | 0.84          | (0.57~1.22) | 0.86            | (0.64~1.17) | 1.12             | (0.68~1.83) |

|                       |                    |      |             |      |             |      |             |
|-----------------------|--------------------|------|-------------|------|-------------|------|-------------|
| <b>CO</b>             | +O <sub>3</sub>    | 0.83 | (0.55~1.26) | 0.90 | (0.62~1.30) | 1.06 | (0.65~1.75) |
|                       | +SO <sub>2</sub>   | 0.85 | (0.57~1.27) | 0.88 | (0.63~1.22) | 1.02 | (0.62~1.68) |
|                       | +NO <sub>2</sub>   | 0.94 | (0.74~1.18) | 0.95 | (0.75~1.20) | 0.87 | (0.70~1.08) |
|                       | +O <sub>3</sub>    | 0.94 | (0.73~1.22) | 0.98 | (0.76~1.26) | 0.85 | (0.68~1.05) |
| <b>SO<sub>2</sub></b> | +PM <sub>10</sub>  | 1.00 | (0.78~1.29) | 1.02 | (0.78~1.33) | 0.86 | (0.69~1.07) |
|                       | +SO <sub>2</sub>   | 0.94 | (0.75~1.18) | 0.95 | (0.75~1.20) | 0.86 | (0.69~1.07) |
|                       | +NO <sub>2</sub>   | 0.94 | (0.80~1.11) | 0.95 | (0.81~1.11) | 1.13 | (0.95~1.34) |
|                       | +O <sub>3</sub>    | 0.94 | (0.80~1.11) | 0.96 | (0.82~1.12) | 1.13 | (0.95~1.35) |
|                       | +PM <sub>10</sub>  | 0.99 | (0.82~1.18) | 0.99 | (0.83~1.19) | 1.15 | (0.96~1.37) |
|                       | +PM <sub>2.5</sub> | 0.97 | (0.81~1.15) | 0.97 | (0.82~1.16) | 1.13 | (0.94~1.34) |
|                       | +CO                | 0.95 | (0.80~1.12) | 0.95 | (0.81~1.11) | 1.12 | (0.94~1.33) |

---

Bonferroni corrections with significance ( $p < 0.006$ ), \*\*  $p < 0.006$ , and \*\*\*  $p < 0.001$ .

Abbreviations: GDM-CH, GDM with combined hyperglycemia; NO<sub>2</sub>, nitrogen dioxide; O<sub>3</sub>, ozone; PM<sub>10</sub>, inhalable particulate matter; PM<sub>2.5</sub>, fine particulate matter; CO, carbon monoxide; SO<sub>2</sub>, sulfur dioxide.

Model adjusted for maternal age, first-trimester BMI, gravidity, parity, tobacco, alcohol, folic acid, assisted reproduction, macrosomia, multiple pregnancies, the season of OGTT, temperature, and relative humidity.



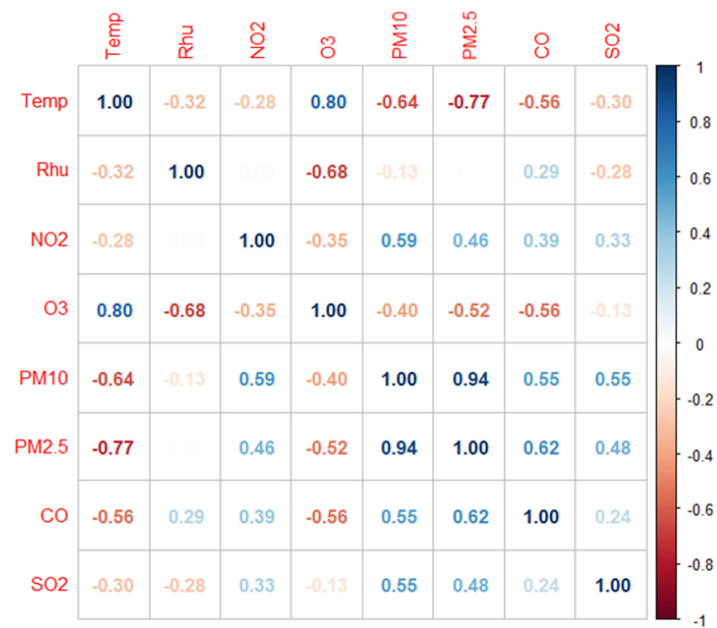

**Figure S1.** Spearman's correlation analysis of specific gestational pollutants and meteorological factors.

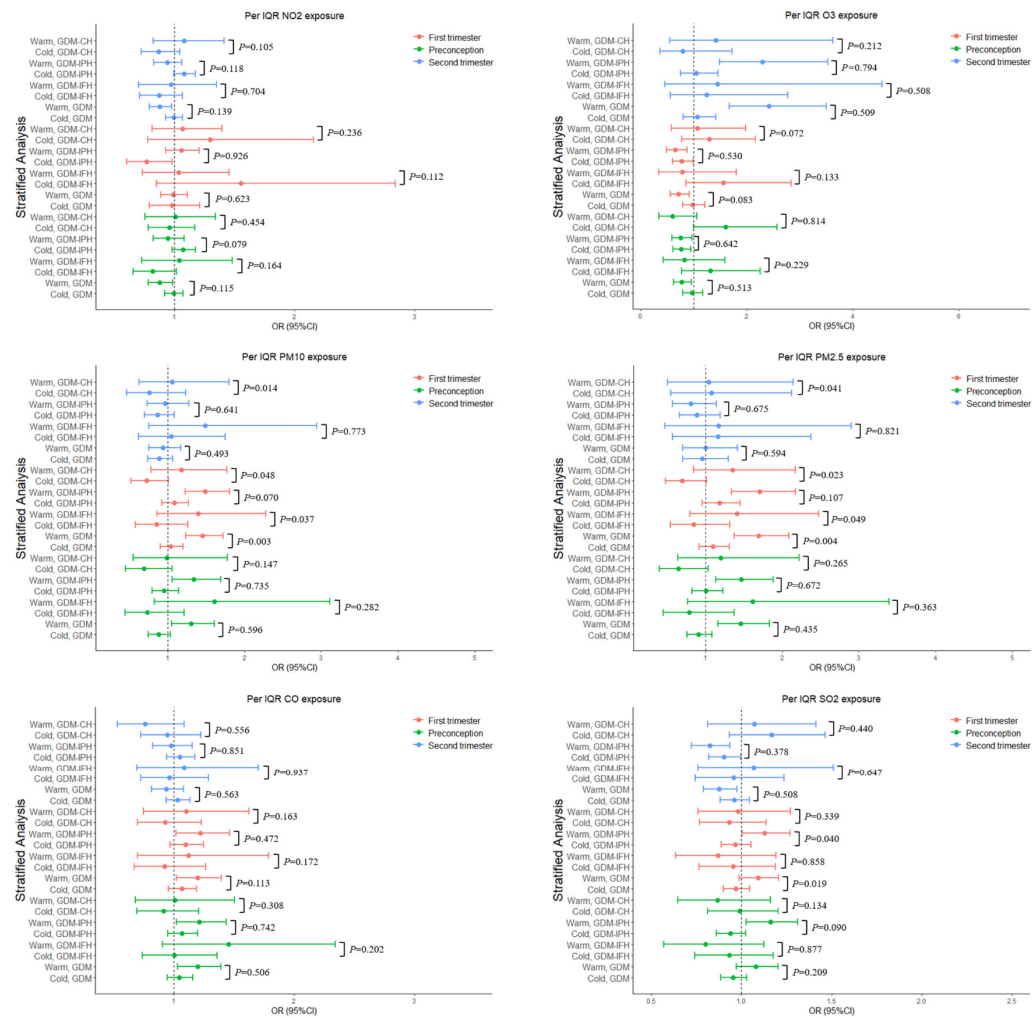

**Figure S2.** Modification for the potential effects of air pollution exposure in association with GDM subgroups according to cold and warm seasons. *P*-value is

shown for interaction. Abbreviations: GDM, gestational diabetes mellitus; GDM-IFH, GDM with isolated fasting hyperglycemia; GDM-IPH, GDM with isolated post-load hyperglycemia; GDM-CH, GDM with combined hyperglycemia; NO<sub>2</sub>, nitrogen dioxide; O<sub>3</sub>, ozone; PM<sub>10</sub>, inhalable particulate matter; PM<sub>2.5</sub>, fine particulate matter; CO, carbon monoxide; SO<sub>2</sub>, sulfur dioxide; IQR, interquartile range.

Model adjusted for maternal age, first-trimester BMI, gravidity, parity, tobacco, alcohol, folic acid, assisted reproduction, macrosomia, multiple pregnancies, temperature, and relative humidity.

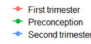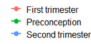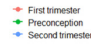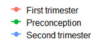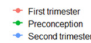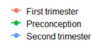

**Figure S3.** Modification for the potential effects of air pollution exposure in association with GDM subgroups according to maternal age. *P*-value is shown for interaction. Abbreviations: GDM, gestational diabetes mellitus; GDM-IFH, GDM with isolated fasting hyperglycemia; GDM-IPH, GDM with isolated post-load hyperglycemia; GDM-CH, GDM with combined hyperglycemia; NO<sub>2</sub>, nitrogen dioxide; O<sub>3</sub>, ozone; PM<sub>10</sub>, inhalable particulate matter; PM<sub>2.5</sub>, fine particulate matter; CO, carbon monoxide; SO<sub>2</sub>, sulfur dioxide; IQR, interquartile range.

Model adjusted for first-trimester BMI, gravidity, parity, tobacco, alcohol, folic acid, assisted reproduction, macrosomia, multiple pregnancies, the season of OGTT, temperature, and relative humidity.

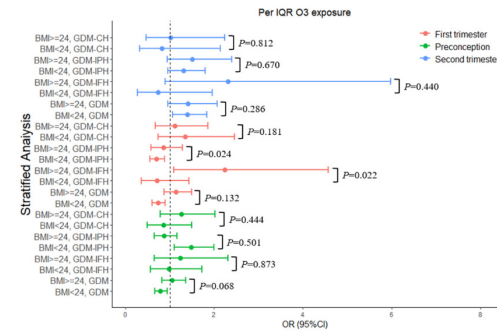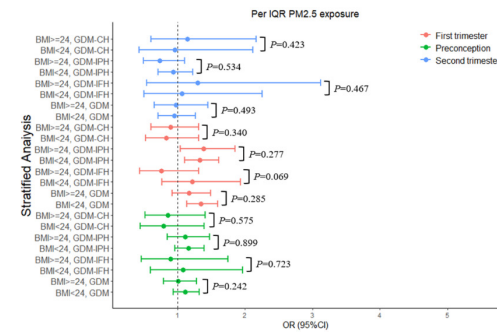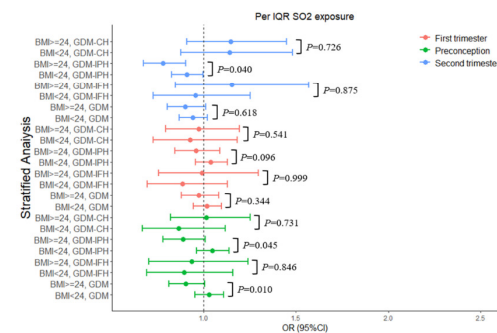

**Figure S4.** Modification for the potential effects of air pollution exposure in association with GDM subgroups according to BMI in the first trimester. *P* value for interaction.

Abbreviations: GDM, gestational diabetes mellitus; GDM-IFH, GDM with isolated fasting hyperglycemia; GDM-IPH, GDM with isolated post-load hyperglycemia; GDM-CH, GDM with combined hyperglycemia; NO<sub>2</sub>, nitrogen dioxide; O<sub>3</sub>, ozone; PM<sub>10</sub>, inhalable particulate matter; PM<sub>2.5</sub>, fine particulate matter; CO, carbon monoxide; SO<sub>2</sub>, sulfur dioxide; IQR, interquartile range.

Model adjusted for maternal age, gravidity, parity, tobacco, alcohol, folic acid, assisted reproduction, macrosomia, multiple pregnancies, the season of OGTT, temperature, and relative humidity.
